# Supplementary material for: Enhanced Immunogenicity and Protective Effects against SARS-CoV-2 Following Immunization with a Recombinant RBD-IgG Chimeric Protein
Source: MDPI journal article supplement (doi:10.3390/vaccines12040356), 2024-03-27
Supplement: s1 [file s1]

## Supplementary material

### 1. Methods

#### 1.1-Western blot analysis

Protein samples, comprising 2  $\mu$ g of purified RBD-IgG and 0.56  $\mu$ g of non-fused RBD proteins, underwent polyacrylamide gel electrophoresis (SDS-PAGE, 12%) under both reducing and non-reducing conditions. Subsequently, the separated proteins were transferred onto nitrocellulose membranes (GE Healthcare Life Sciences). Membrane staining was performed with a human monoclonal anti-RBD (1 $\mu$ g/mL) (produced in house) or with a mouse anti-Kappa and anti-IgG Fc-specific antibodies. Reactive protein bands were identified by exposure of the membranes to a luminol-hydrogen peroxide solution according to the manufacturer's instructions (Sigma Aldrich, San Luis, USA).

### 2. Figure

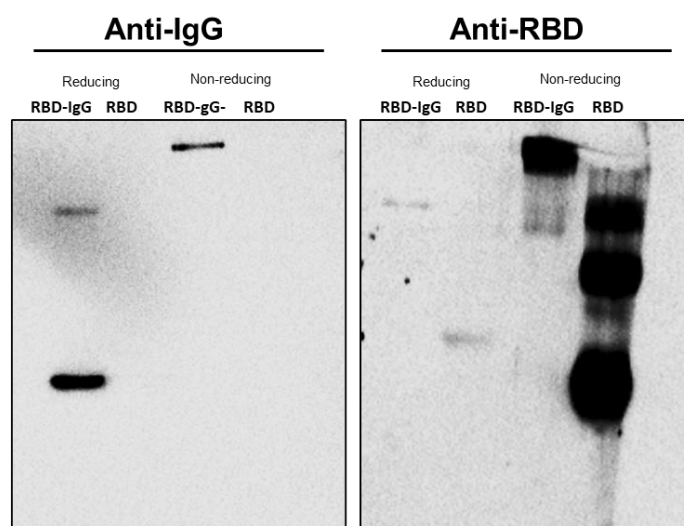

**Figure S1. Detection of RBD and IgG chains in Western blot analysis.** Aliquots containing 2  $\mu$ g of purified RBD-IgG and 0.56  $\mu$ g of non-fused RBD proteins were sorted in 12% polyacrylamide gels under both reducing and non-reducing conditions. Detection of IgG chains was performed with a mouse anti-Kappa and anti-IgG Fc-specific antibodies, and RBD with a human monoclonal anti-RBD antibody (1 $\mu$ g/mL).

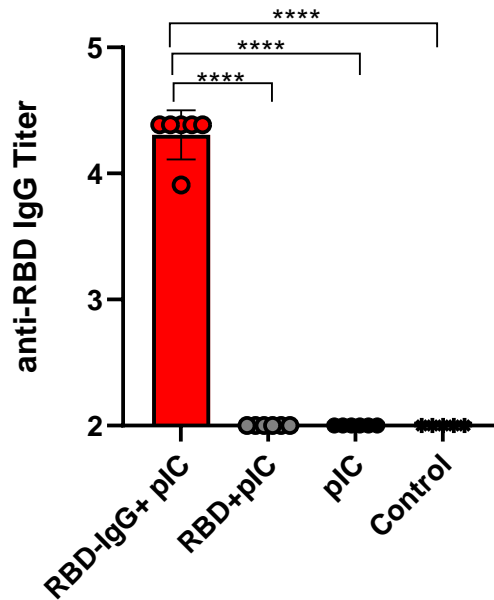

**Figure S2. Serological analysis of RBD IgG titers in pre-challenged mice.** K18-hACE2 mice were immunized twice with 5  $\mu$ g of RBD-IgG or 1.4  $\mu$ g of non-fused RBD, both adjuvanted with 50  $\mu$ g of Poly (I:C), administered at a 2-week interval. Sera were collected 14 days after the last dose and detected for specific IgG. After that, the animals were challenged intranasally with  $2.8 \times 10^5$  TCID<sub>50</sub> of the Wuhan SARS-CoV-2 strain, as described in Figure 4. Results represented as mean  $\pm$  SD. Statistical differences are indicated in the graphs, \*\*\*\*p < 0.0001. One way ANOVA with Tukey's post-test
